# Supplementary material
Source: PubMed Central journal article supplement (PMC4007373)
Supplement: NIHMS562234-supplement-01.pdf [file NIHMS562234-supplement-01.pdf]

Supplemental

GSP LDA

GSP ICA

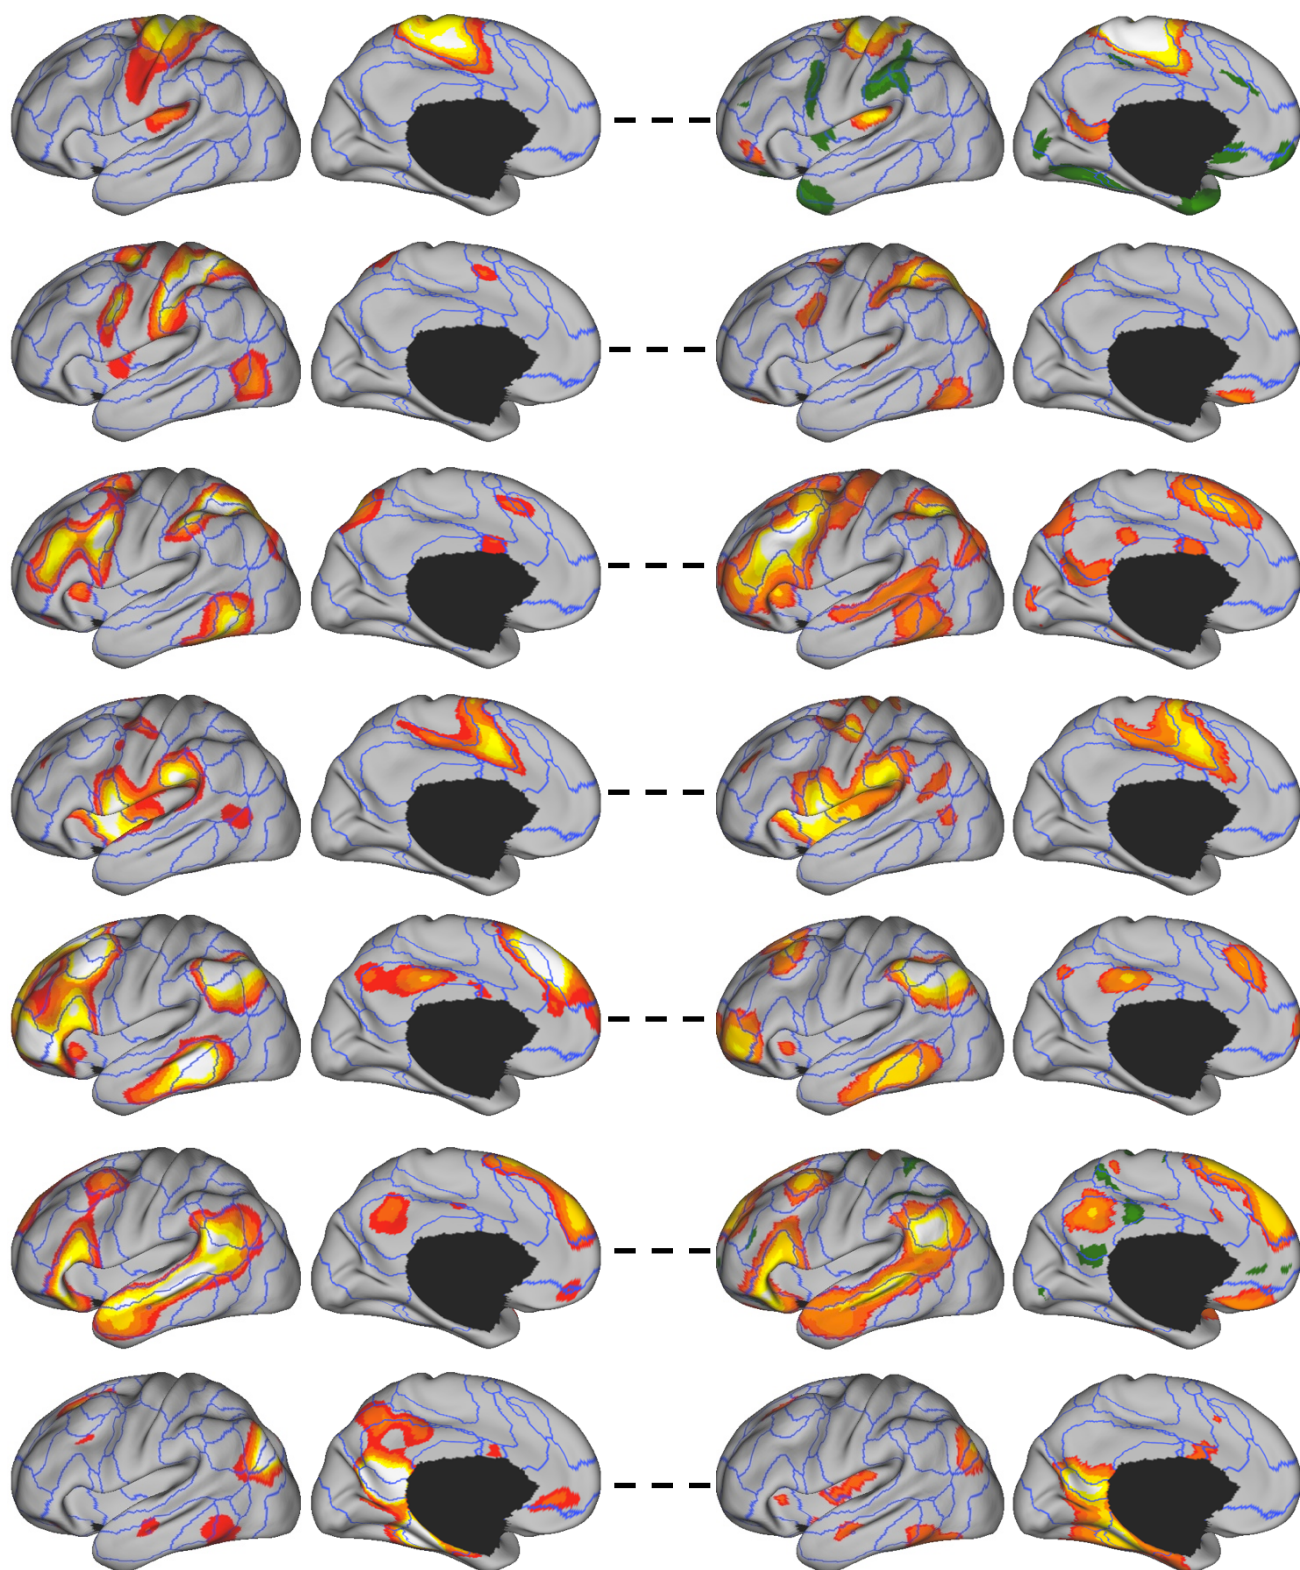

1e-4  5e-4

-10  10

Supp Figure 1

HCP LDA

HCP ICA

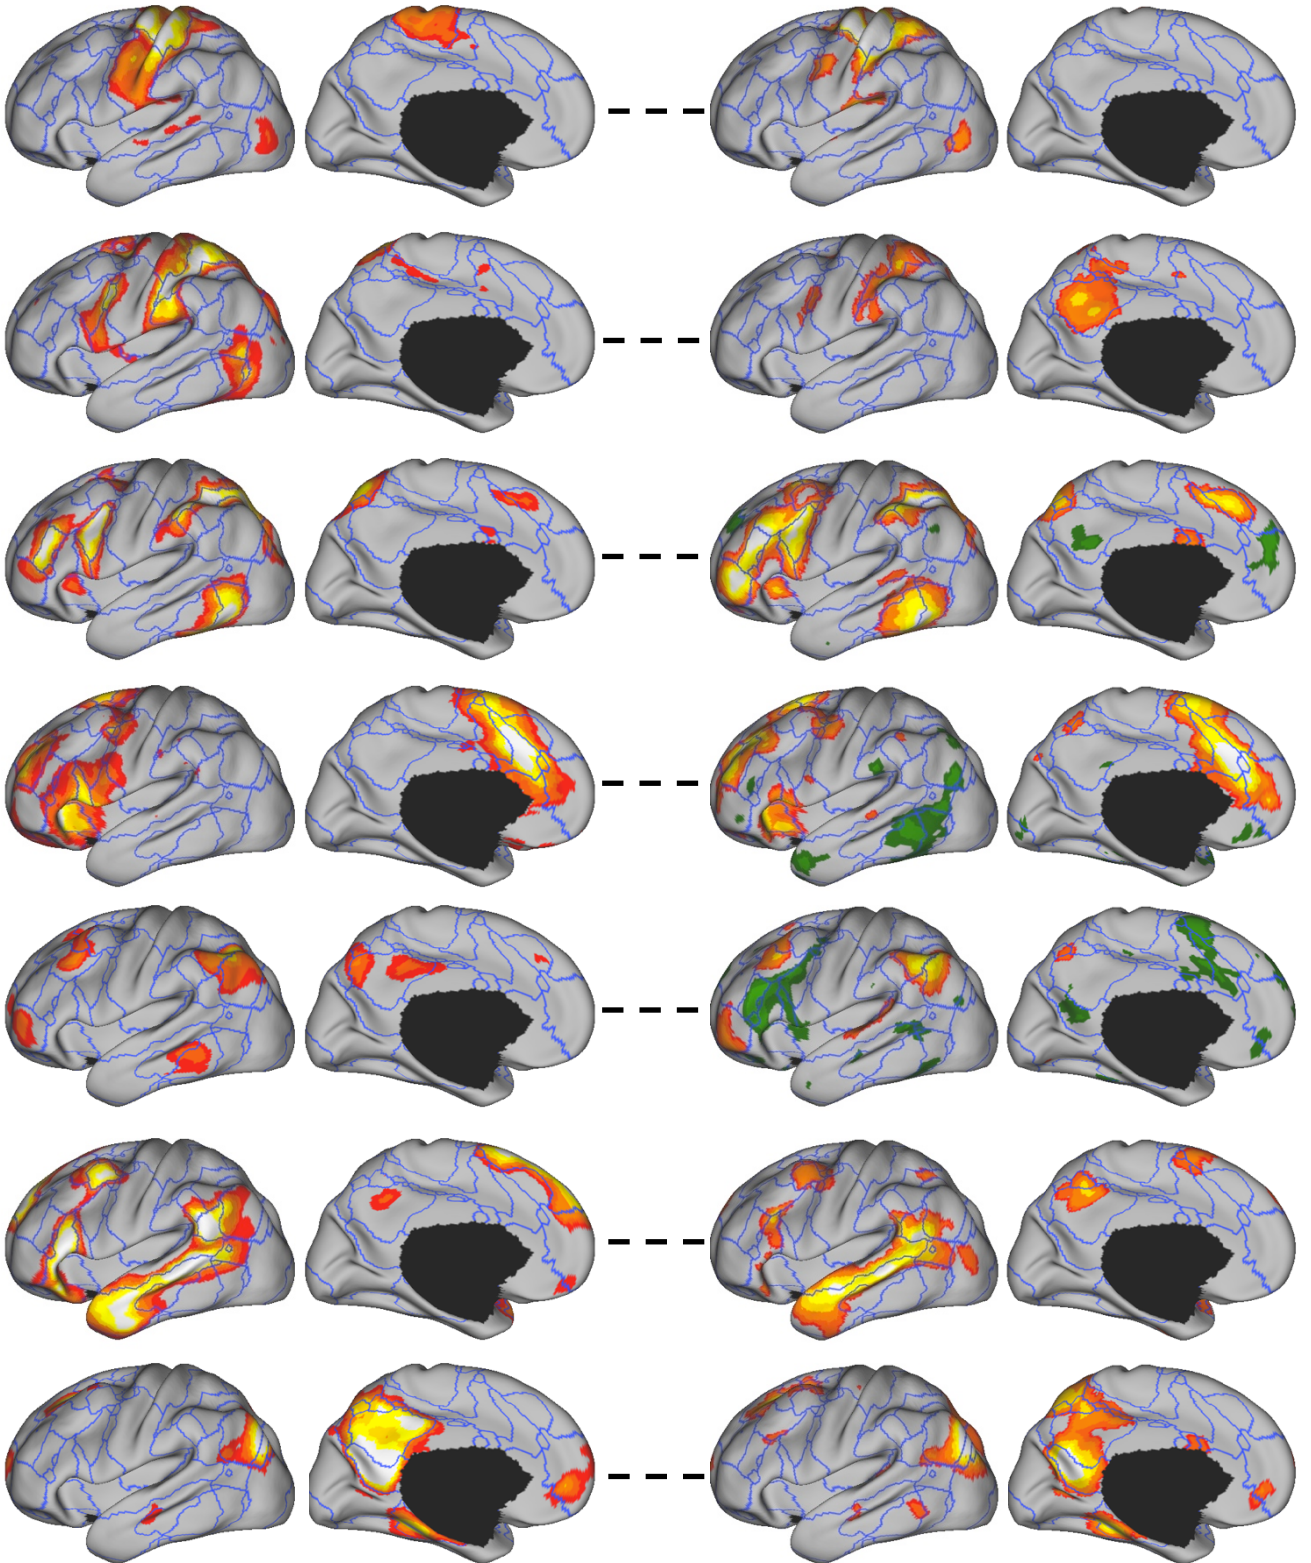

$1e-4$    $5e-4$

-10  10

Supp Figure 2

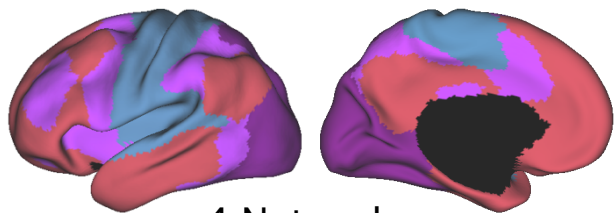

4 Networks

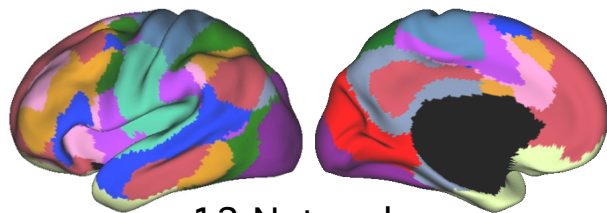

12 Networks

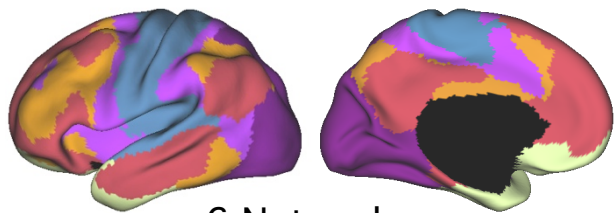

6 Networks

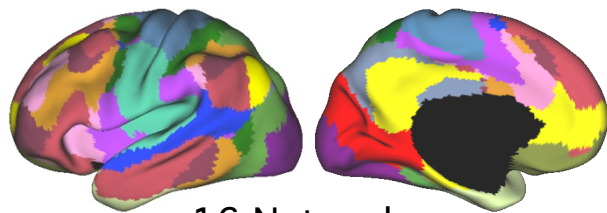

16 Networks

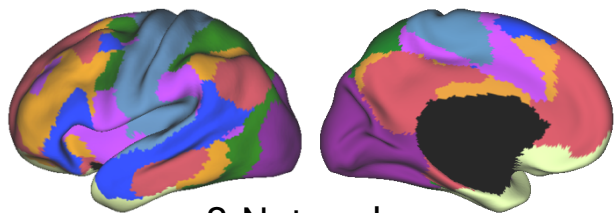

8 Networks

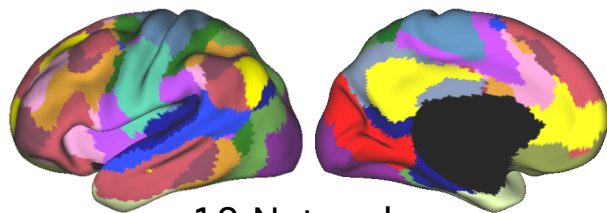

18 Networks

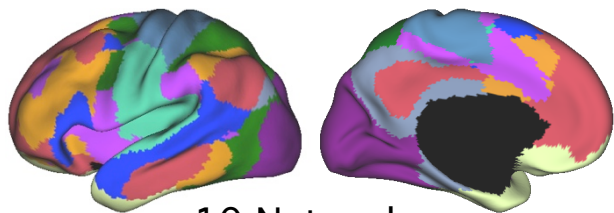

10 Networks

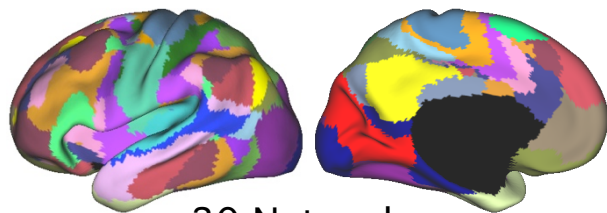

30 Networks

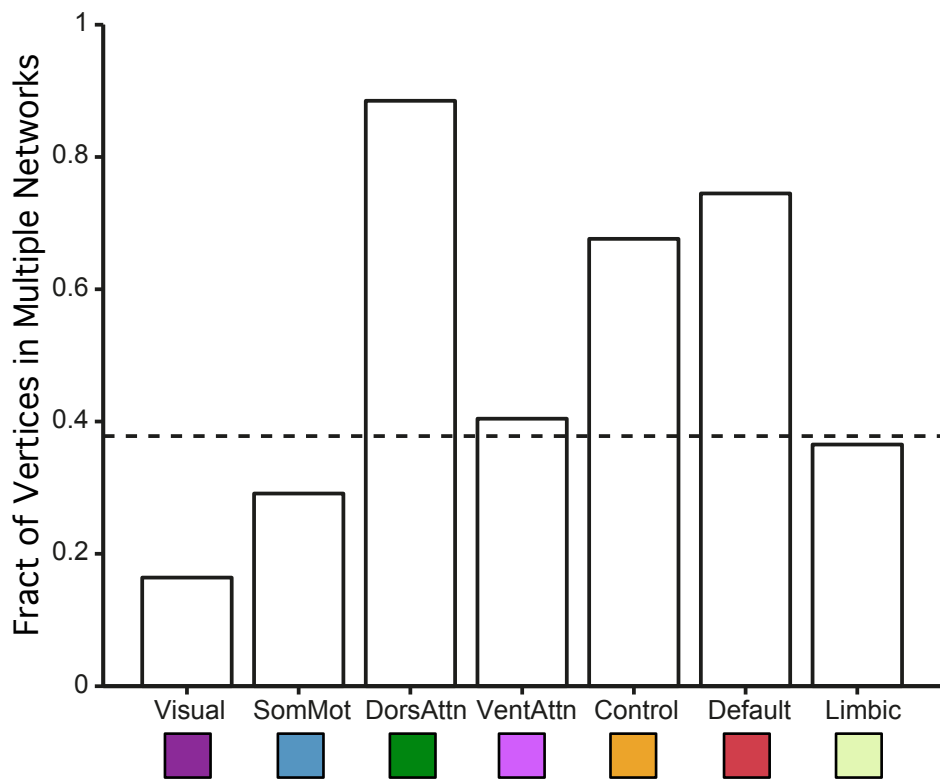

Supp Figure 4

**A**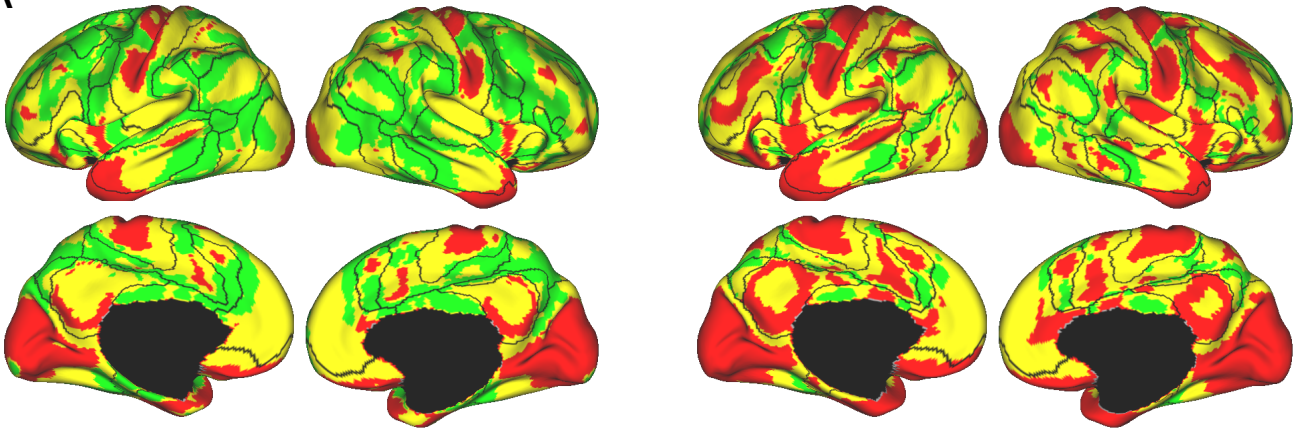

7 Networks, 0.75/7 threshold

7 Networks, 1.25/7 threshold

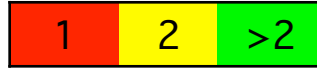**B**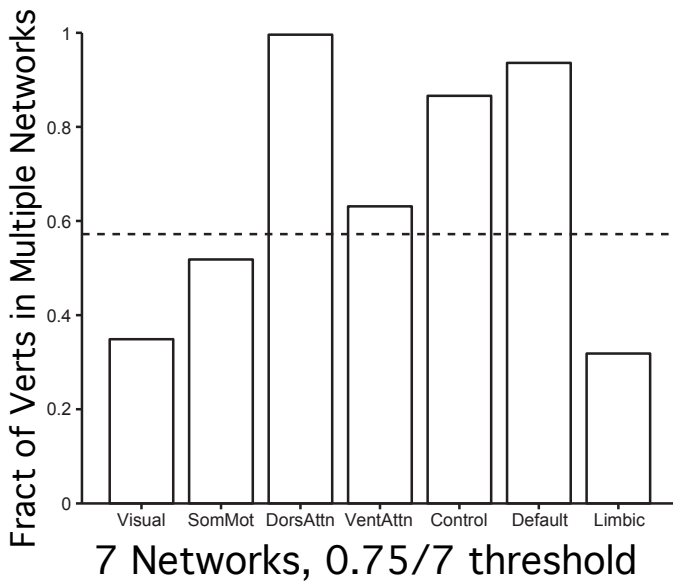

7 Networks, 0.75/7 threshold

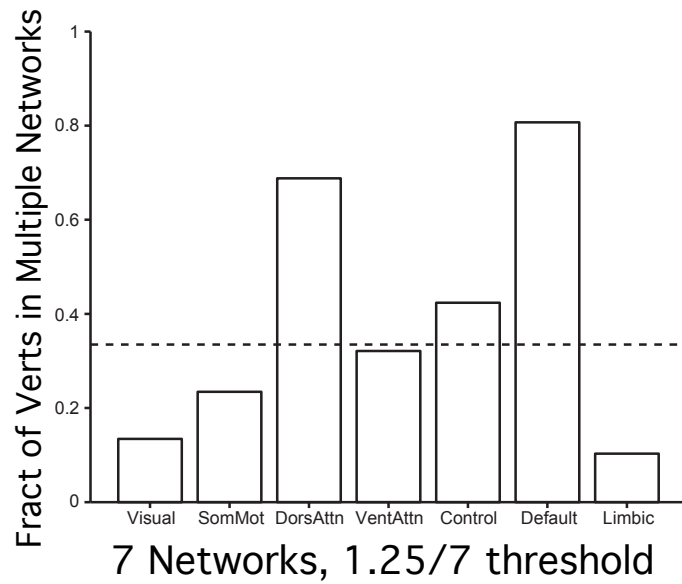

7 Networks, 1.25/7 threshold

**A**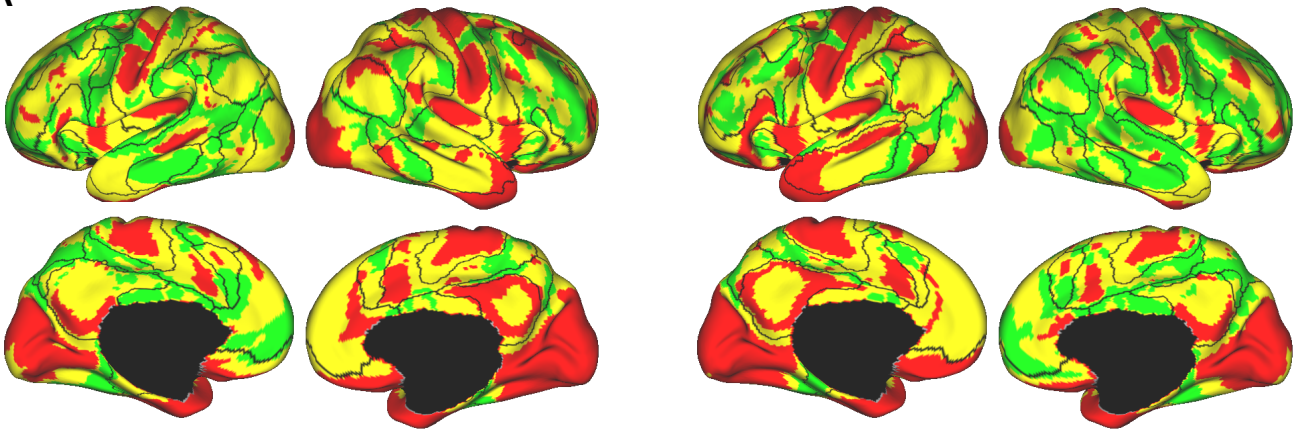

6 Networks, 1/6 threshold

8 Networks, 1/8 threshold

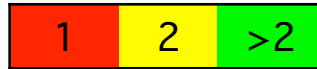**B**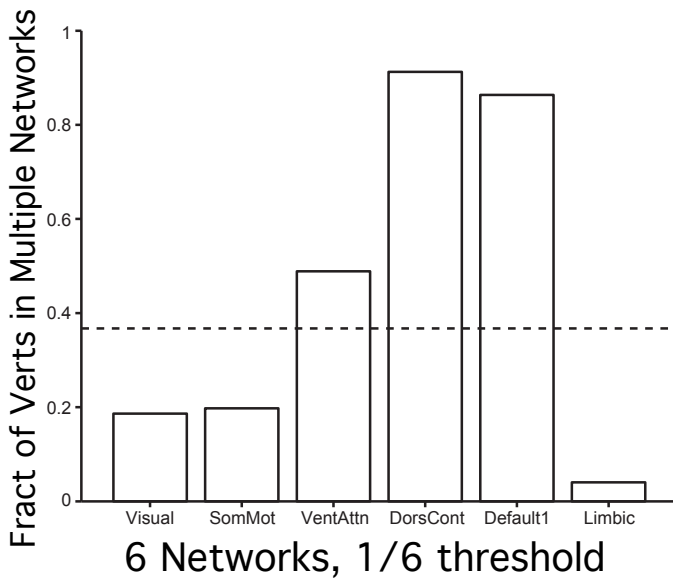

6 Networks, 1/6 threshold

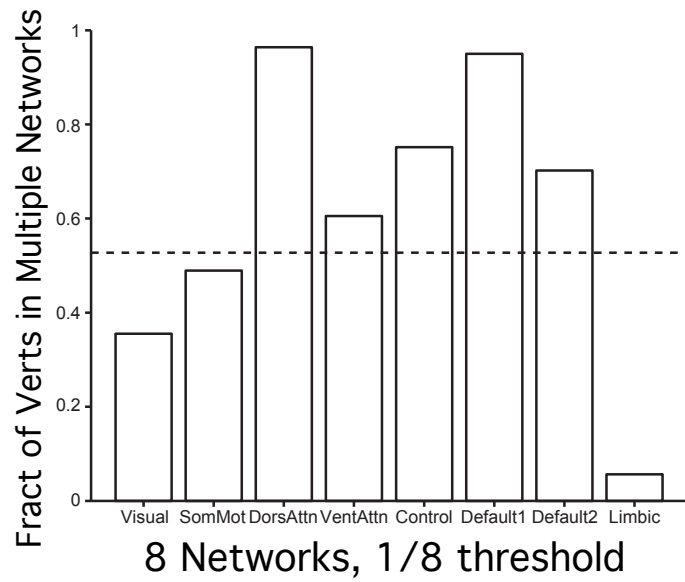

8 Networks, 1/8 threshold

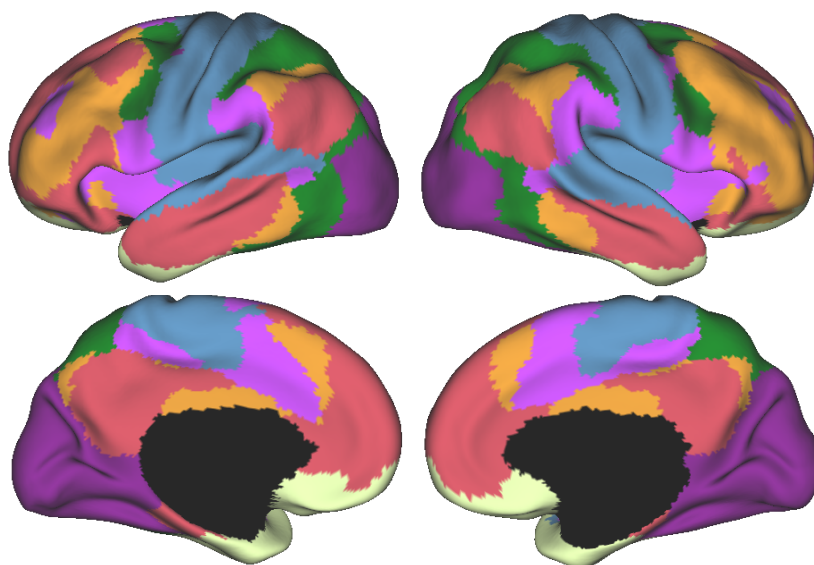

7 Networks

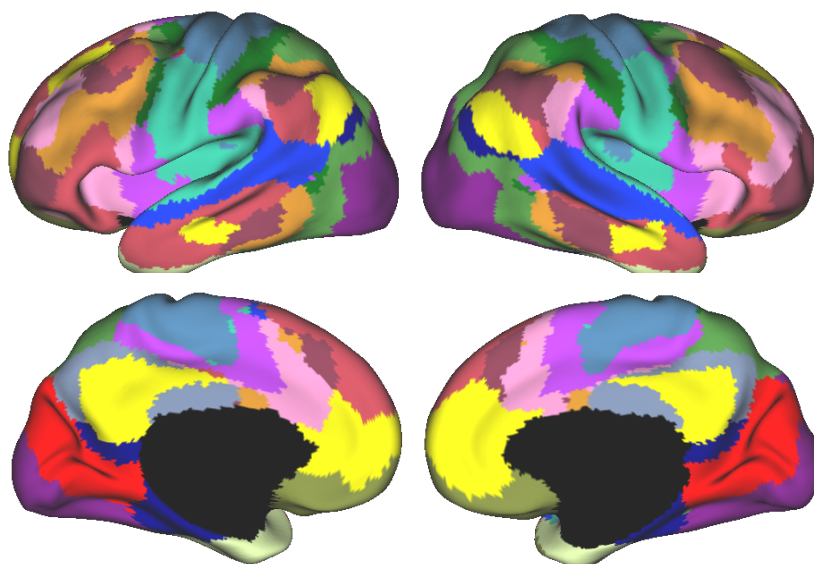

17 Networks
